# Supplementary material for: Colorimetric Quantification for Residual Poly-DADMAC in Water Treatment
Source: MDPI journal article supplement (doi:10.3390/w15193352), 2023-09-24
Supplement: s1 [file s1]

Archive with 1 entries (1 files):
- water-2597729-supplementary.pdf
